# Supplementary material
Source: Springer Nature journal article supplement (https://www.springermedizin.de/resource/supplementary/12885_2009_1768_MOESM9_ESM.pdf/9472888)

Tumour cell staining  
(stroma negative)

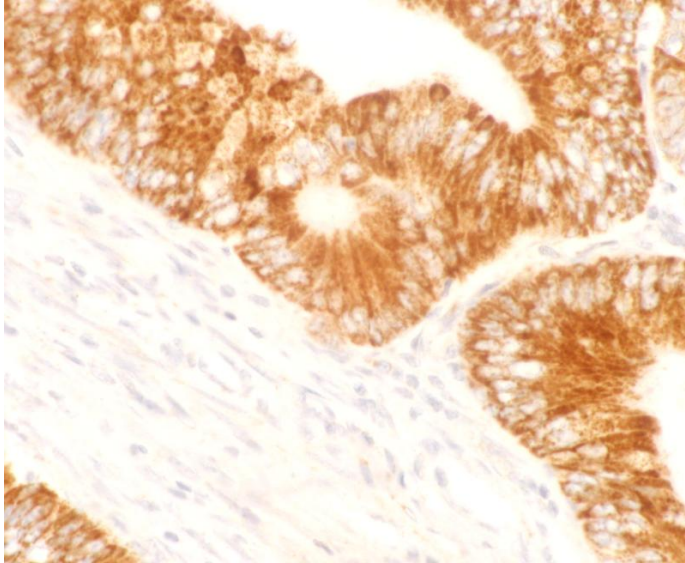

Tumour stromal staining  
(tumour cells negative)

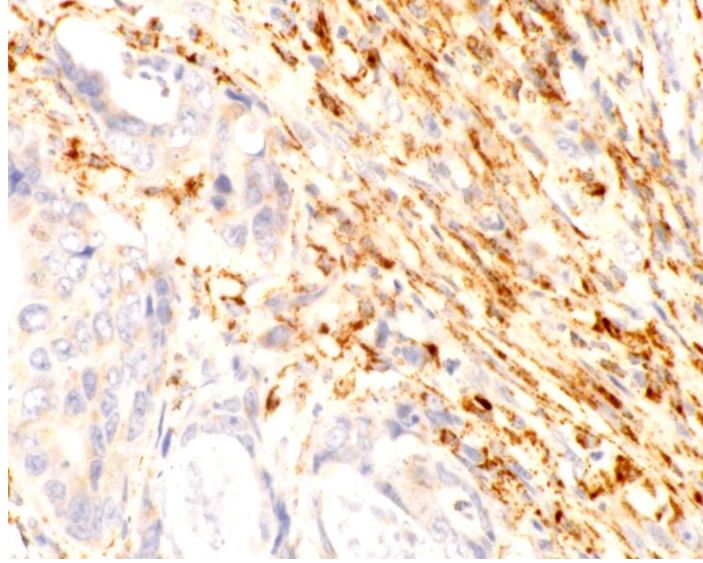

Supplement: MOESM9 [file 9472888]
